# Supplementary material
Source: publisher figshare collection journal article supplement (https://springernature.figshare.com/ndownloader/files/17245733)
Supplement: Supplementary file [file 17245733]

Additional file 4: Table S4: Significant digenic/ epistatic interactions ( $P \leq 1.0 \times 10^{-5}$ ) and LOD values for agronomic and physiological traits in an F<sub>2:3</sub> population from a cross between Capsule/BR29.

| Trait    | Chr-A | Locus-A | Chr-B | Locus-B | Total LOD for association (LODt) | Interaction LOD (IX) | LOD for Locus-A main effect (Main-A) | LOD for Locus-B main effect (Main-B) | Type of interaction        |
|----------|-------|---------|-------|---------|----------------------------------|----------------------|--------------------------------------|--------------------------------------|----------------------------|
| Survival | 3     | RM5928  | 3     | RM6329  | 8.15                             | 3.07                 | 1.07                                 | 3.65                                 | Between QTL and Background |
|          | 3     | RM14795 | 3     | RM6329  | 10.17                            | 5.35                 | 0.24                                 | 3.70                                 | Between QTL and Background |
|          | 3     | RM251   | 3     | RM6329  | 8.15                             | 3.59                 | 0.37                                 | 3.70                                 | Between QTL and Background |
| SES      | 3     | RM5928  | 3     | RM6329  | 10.13                            | 3.24                 | 1.04                                 | 5.18                                 | Between QTL and Background |
|          | 3     | RM14795 | 3     | RM6329  | 10.76                            | 4.43                 | 0.39                                 | 5.26                                 | Between QTL and Background |
|          | 3     | RM251   | 3     | RM6329  | 9.78                             | 3.13                 | 0.80                                 | 5.26                                 | Between QTL and Background |
